# Supplementary material
Source: PubMed Central journal article supplement (PMC4846896)
Supplement: ajtr0008-0460-f7.pdf [file ajtr0008-0460-f7.pdf]

## Renoprotective of propofol on UUO via EMT inhibition

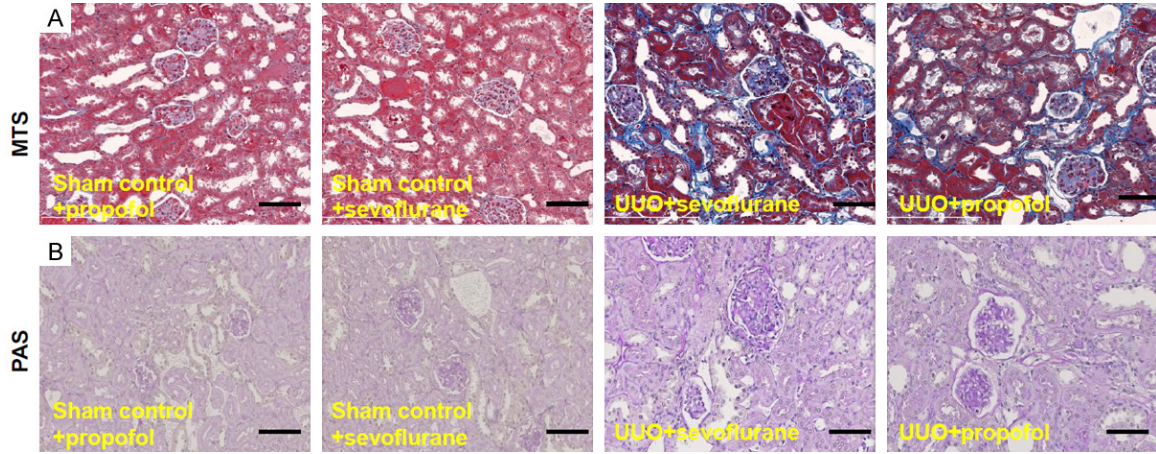

**Supplementary Figure 1.** Propofol can not amelioration of kidney fibrosis in later periods of UUO mice (day 28). A: MTS staining for kidney of of the indicated group of mice. B: PAS staining in kidney of the indicated group of mice. Scale bar: 50  $\mu$ m. N = 5 were analyzed.

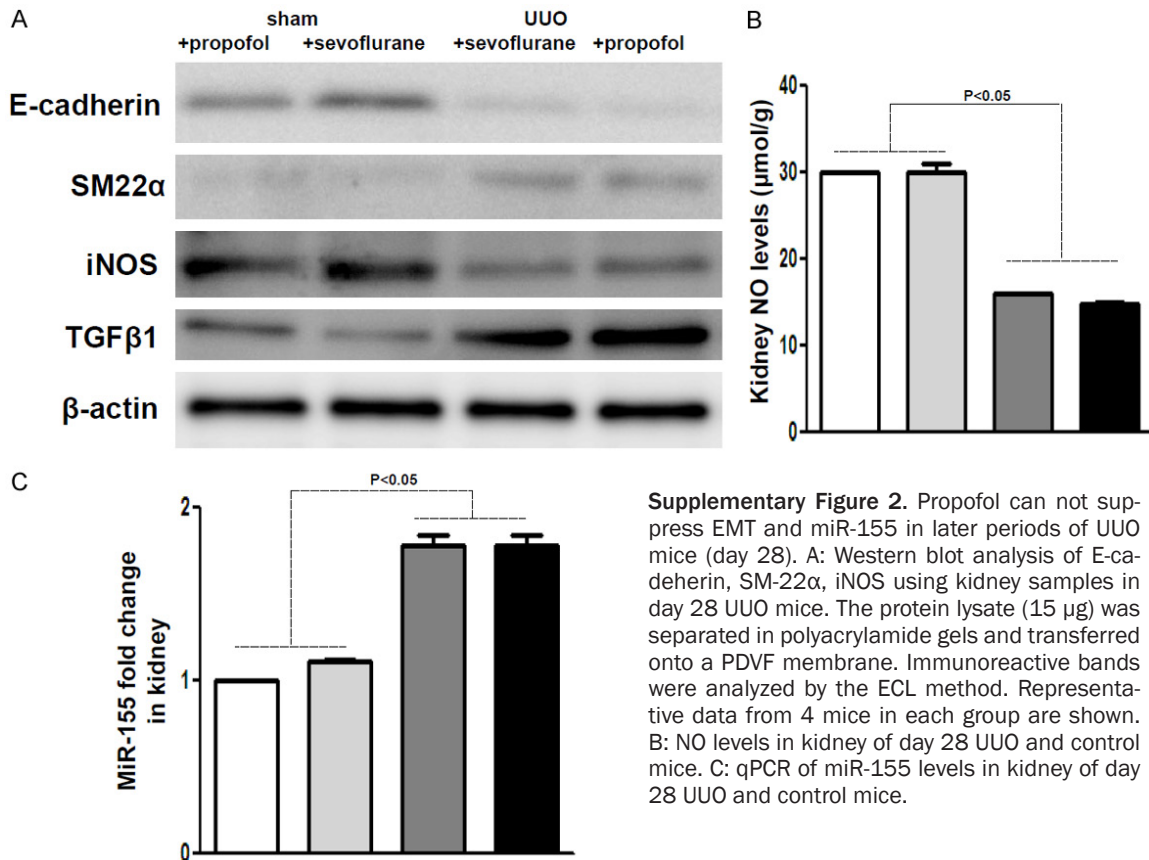

**Supplementary Figure 2.** Propofol can not suppress EMT and miR-155 in later periods of UUO mice (day 28). A: Western blot analysis of E-cadherin, SM-22 $\alpha$ , iNOS using kidney samples in day 28 UUO mice. The protein lysate (15  $\mu$ g) was separated in polyacrylamide gels and transferred onto a PDVF membrane. Immunoreactive bands were analyzed by the ECL method. Representative data from 4 mice in each group are shown. B: NO levels in kidney of day 28 UUO and control mice. C: qPCR of miR-155 levels in kidney of day 28 UUO and control mice.
